# Supplementary material
Source: publisher figshare collection journal article supplement (https://gsapubs.figshare.com/ndownloader/files/23317769)
Supplement: Supplementary file 1 [file 23317769]

# Detrital garnet geochronology: Application in tributaries of the French Broad River, southern Appalachian Mountains, USA

**Kathryn A. Maneiro, Ethan F. Baxter, Scott D. Samson, Horst R. Marschall, and Jack Hietpas**

## **SUPPLEMENTARY GEOLOGIC BACKGROUND**

### **Previously Published Detrital Geochronology: Tributaries and French Broad Main Trunk**

Pb-Th detrital monazite ages by secondary ion mass spectrometry (SIMS) and U-Pb detrital zircon ages by SIMS and by laser ablation- inductively coupled plasma- mass spectrometry (LA-ICP-MS) for the tributary streams were previously published by Hietpas et al. (2010). Published zircon and monazite ages included one sigma age errors that incorporate analytical error along with propagation of errors from uncertainty in decay constant, standard analysis, and standard age.

Published tributary detrital U-Pb zircon and detrital Th-Pb monazite ages preserve different portions of the regional tectonometamorphic record (Hietpas et al., 2010; Moecher et al., 2011). U-Pb igneous crystallization ages from detrital zircon cores in all three tributaries record only the Grenville Orogeny, likely due to sampling within a restricted basin, efficient recycling of abundant Grenville province zircon due to zircon's chemical resistance, and failure of later events to attain the conditions necessary for new zircon nucleation (Morton and Hallsworth, 1999; Rubatto et al., 2001). Younger metamorphic rims for detrital zircon grains in the tributaries record Ordovician ages associated with Taconic metamorphism or Silurian ages younger than the classic Taconic age range (Moecher et al., 2011; Hietpas et al., 2010). Previous studies did not attribute specific tectonic significance to the limited Silurian rim ages (Moecher et al., 2011; Hietpas et al., 2010). Pb-Th detrital monazite core crystallization ages have a strong

age peak at ca. 460 Ma (Hietpas et al., 2010), in agreement with U-Pb zircon crystallization ages from leucosome at Winding Stair Gap, NC, interpreted to constrain the timing of the Taconic metamorphic peak ( $458.1 \pm 1$  Ma, MSWD=0.095; Moecher et al., 2004). Additional limited U-Th-Pb ages for metamorphic rims on two monazite grains from the tributaries give ages of  $395 \pm 6$  Ma and  $427 \pm 6$  Ma that agree with younger detrital zircon rim ages, while the third gives a rim age of  $479 \pm 5$  Ma in agreement with the oldest monazite core ages (Moecher et al., 2011). No clear Neoacadian or Alleghenian signal was previously reported from modern detritus captured within the studied tributaries (Hietpas et al., 2010; Moecher et al., 2011).

The detrital U-Pb apatite and U-Pb rutile metamorphic crystallization ages from main trunk alluvium record all four major orogenic events, although the youngest events (Neoacadian and Alleghenian) are the dominant age signals recorded by apatite and rutile (O'Sullivan et al., 2016). The detrital U-Pb zircon record is dominated by core igneous crystallization ages from the Grenville Orogeny and metamorphic rim ages from the Taconic Orogeny, with little evidence for the youngest Neoacadian and Alleghanian events (Hietpas et al., 2010; Moecher et al., 2011). Th-Pb monazite detrital ages also record all four major orogenies through metamorphic crystallization but with a dominant Taconic age population. Scattered Silurian and Devonian ages between the Taconic and Neoacadian events can be found in the detrital monazite, zircon rim, apatite, and rutile records (Hietpas et al., 2010; Moecher et al., 2011; O'Sullivan et al., 2016).

## **SUPPLEMENTARY METHODOLOGY**

### **Garnet Chemistry: SEM Surface Analysis**

SEM grain surface analyses provide major element chemistry for identification of garnet sub-populations and determination of garnet compositional range prior to dating individual grains. Although surface measurements are biased toward the rim composition and may be systematically offset from measurements obtained on polished grain centers for chemically zoned garnet grains, use of surface analyses are preferred to avoid sample loss from polishing for grain center analyses. Values for end-member chemistry and associated errors are available in Table S1. Two different ternary diagrams in Figure S1 plot the major element chemistry from surface analyses based on the four predominant cation components of garnet (Fe, Mn, Mg, and Ca).

**Table S1. Surface major element chemistry by tabletop SEM for dated garnet grains**

Garnet major-element chemistry measured on uncoated, unpolished grain surfaces using a tabletop SEM. The value given for the end-member represents the average of all analyses on a single grain, while the error is one standard deviation of all averaged values. Full SEM data is available by request from the corresponding author.

|             | Grain avg.<br>Pyrope<br>(Mg) | Mg<br>1SD | Grain avg.<br>Almandine<br>(Fe) | Fe<br>1SD | Grain avg.<br>Spessartine<br>(Mn) | Mn<br>1SD | Grain avg.<br>Grossular<br>(Ca) | Ca<br>1SD |
|-------------|------------------------------|-----------|---------------------------------|-----------|-----------------------------------|-----------|---------------------------------|-----------|
| T1 grain04  | 12.31                        | 3.85      | 75.47                           | 2.93      | 7.48                              | 1.77      | 4.74                            | 0.65      |
| T2 grain12  | 6.33                         | 2.39      | 63.13                           | 1.50      | 10.97                             | 1.20      | 19.57                           | 1.23      |
| T3 grain13  | 12.93                        | 4.14      | 72.80                           | 3.60      | 6.36                              | 1.21      | 7.91                            | 1.75      |
| T4 grain08  | 19.12                        | 3.24      | 69.76                           | 3.74      | 6.71                              | 1.09      | 4.41                            | 0.85      |
| T5 grain03  | 15.11                        | 2.64      | 68.61                           | 2.42      | 9.13                              | 1.54      | 7.15                            | 1.20      |
| T6 grain09  | 10.40                        | 2.04      | 73.92                           | 3.87      | 7.69                              | 0.04      | 7.99                            | 1.79      |
| T8 grain01  | 13.12                        | 2.15      | 69.55                           | 0.85      | 10.65                             | 2.44      | 6.67                            | 1.14      |
| T9 grain02  | 14.46                        | 2.95      | 70.34                           | 3.60      | 7.01                              | 1.90      | 8.19                            | 2.36      |
| T10 grain05 | 14.59                        | 0.40      | 73.50                           | 0.87      | 5.95                              | 1.17      | 5.95                            | 0.10      |
| T11 grain06 | 16.54                        | 2.28      | 70.00                           | 0.80      | 5.94                              | 1.03      | 7.52                            | 2.49      |
| T13 grain11 | 10.65                        | 4.17      | 70.17                           | 3.20      | 7.94                              | 2.75      | 11.25                           | 0.71      |
| T15 grain16 | 12.71                        | 1.13      | 74.00                           | 1.05      | 5.59                              | 0.60      | 7.69                            | 1.02      |
| T16 grain30 | 17.17                        | 6.62      | 72.28                           | 5.98      | 4.92                              | 1.99      | 5.64                            | 1.90      |
| T17 grain33 | 18.55                        | 1.70      | 68.88                           | 0.00      | 4.67                              | 1.02      | 7.90                            | 2.72      |
| T18 grain36 | 14.36                        | 2.23      | 69.88                           | 8.14      | 4.67                              | 0.48      | 11.09                           | 5.43      |
| T20 grain24 | 12.61                        | 2.03      | 74.38                           | 1.89      | 7.43                              | 0.96      | 5.59                            | 0.76      |
| T22 grain39 | 8.91                         | 3.09      | 64.94                           | 2.55      | 13.50                             | 2.75      | 12.64                           | 3.34      |
| T26 grain35 | 13.69                        | 2.61      | 74.34                           | 2.52      | 4.49                              | 1.28      | 7.48                            | 2.77      |
| T29 grain45 | 8.05                         | 2.01      | 70.88                           | 0.22      | 7.10                              | 0.50      | 13.97                           | 1.70      |

### Figure S1. Ternary plots of garnet major element chemistry

Ternary plots of detrital garnet major element chemistry with discrimination fields in the main panel after Mange and Morton (2007). Type Bi: Granitoids; Type Bii: Amphibolite-grade metasediments. Although the garnet grains fall in both Bi and Bii, Krippner et al. (2014) established that the Mange and Morton (2007) discrimination diagram is limited in its ability to discriminate these two fields. Garnet falling across both regions is “likely derived from metasedimentary rocks up to amphibolite facies rather than from metaigneous rocks” (Krippner et al., 2014). The SEM chemical end-member data in Table S1 supports interpretation of garnet with a metasedimentary origin (amphibolite facies) and some within grain variation, as almandine + spessartine content is routinely less than 97% (Krippner et al, 2014). Inset shows a different ternary arrangement with the grains separated into four series based on resulting age from garnet geochronology. Note the possible correlation of age and Fe content in the inset.

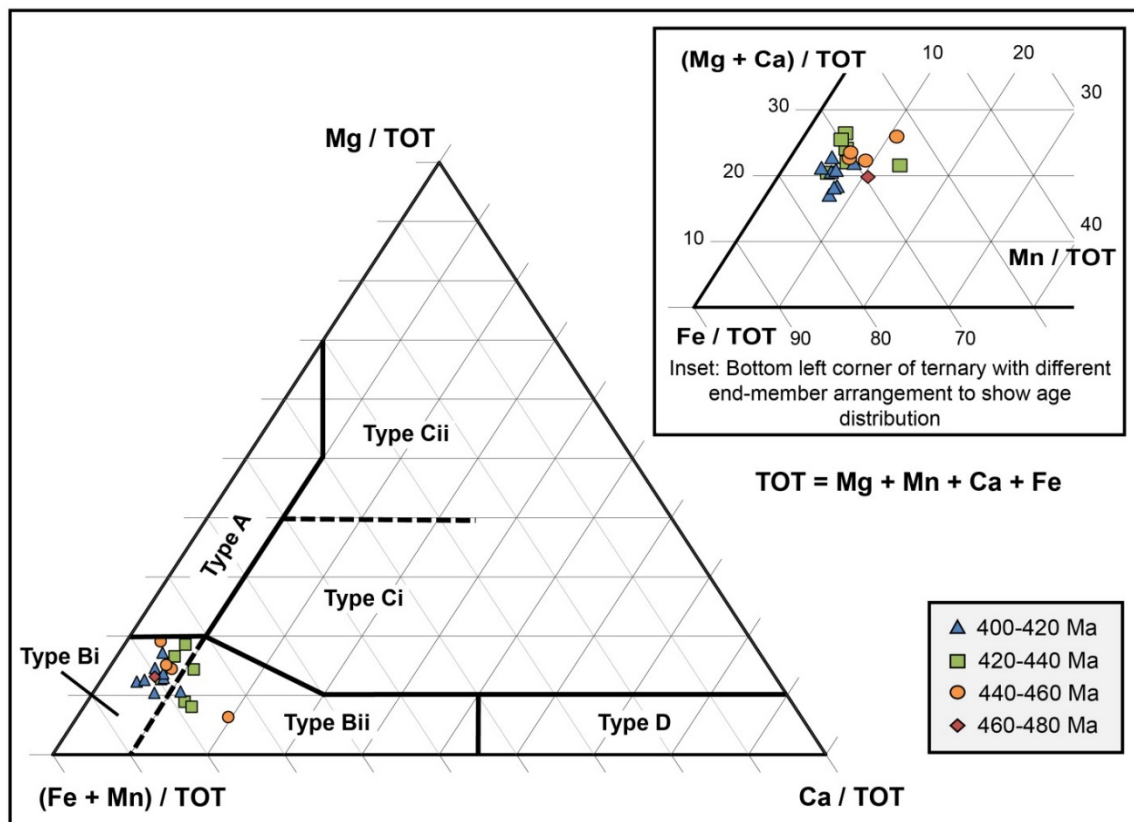

## Blank Correction and Systematic Uncertainty

Repeat analyses of three-column analytical blanks for the study duration resulted in a measured blank magnitude of  $4.3 \pm 0.6$  pg (weighted average,  $n=22$ ). The blank magnitude and weighted average isotope ratios calculated from repeat blank measurements ( $^{147}\text{Sm}/^{144}\text{Nd} = 0.045 \pm 0.017$ ,  $^{143}\text{Nd}/^{144}\text{Nd} = 0.5125 \pm 0.0012$ ) were used to apply a rigorous blank correction to the ages by using Monte Carlo simulation to subtract the effect of the blank from the isotope ratios before averaging the results and calculating a correlation coefficient representing the correlation in the  $^{143}\text{Nd}/^{144}\text{Nd}$  and  $^{147}\text{Sm}/^{144}\text{Nd}$  errors. Calculated isotope ratios and correlation coefficients were then used in Isoplot to calculate blank-corrected ages (Ludwig, 2003). Figure S2 plots original age versus blank-corrected age, demonstrating that despite the extremely small sample sizes, blank correction never changed the age outside of calculated  $2\sigma$  age error and therefore has no impact on the tectonic story.

Each blank-corrected age was then further corrected to include the propagation of uncertainty in the Sm decay constant, resulting in the final garnet ages presented in Figure 2. Decay constant uncertainty is included along with analytical errors, uncertainty on standard analyses, and uncertainty on standard age for the previously published monazite and zircon data (Hietpas et al., 2010). Incorporation of uncertainty from the respective decay constants facilitates appropriate comparison of detrital garnet, monazite, and zircon ages dated using different decay systems.

**Figure S2. Impact of blank-correction on age**

Assessment of the impact of blank-correction on the nineteen accepted ages by comparison of uncorrected and corrected ages, with associated  $2\sigma$  age errors. Note that the magnitude of the calculated age error generally increases slightly after the blank-correction is applied. The age most impacted by blank-correction is also the least precise. The blank-correction introduced minimal change in the absolute age calculated, pulling ages slightly younger but still well within error.

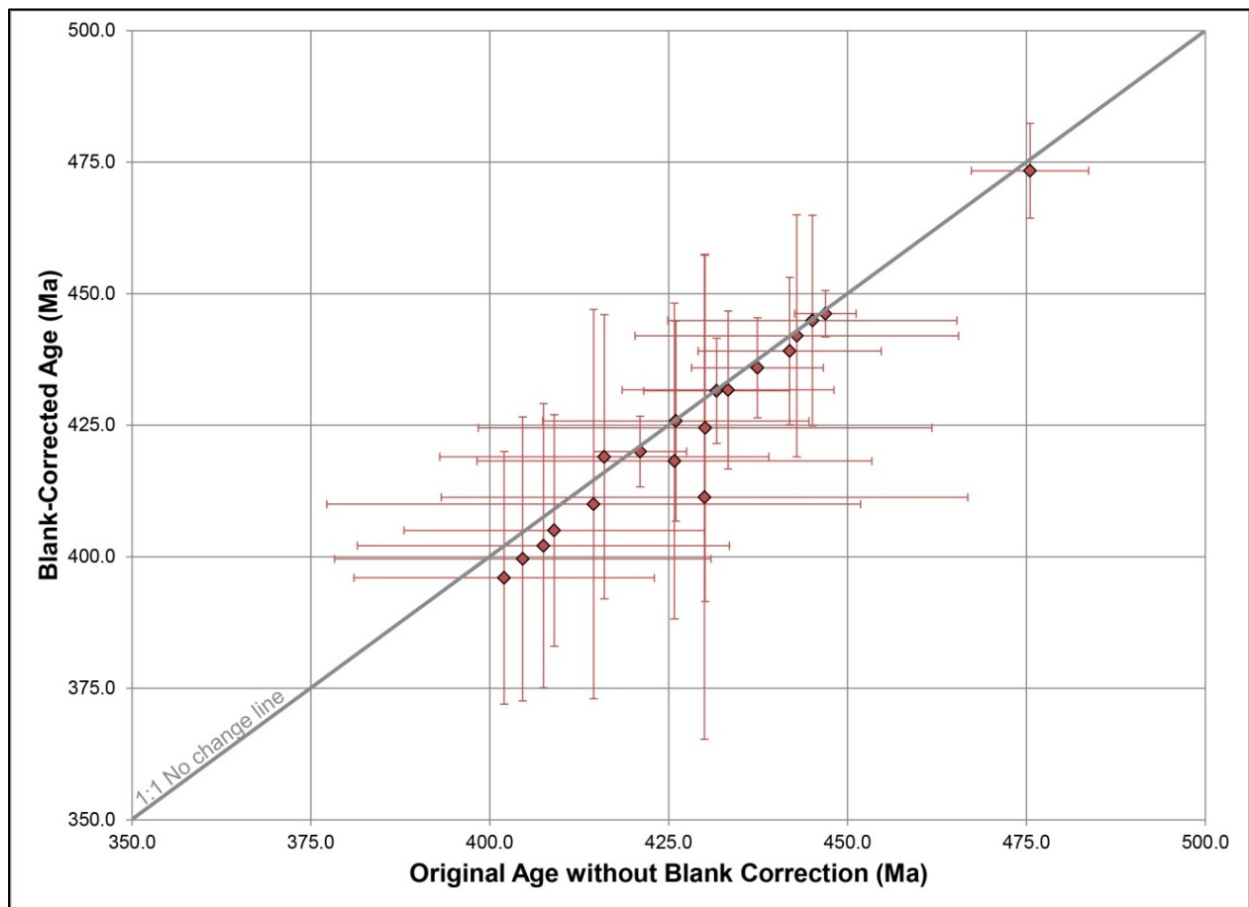

## **SUPPLEMENTARY RESULTS**

### **Detrital Garnet Ages**

Detailed grain size, isotope ratios, and calculated ages for the detrital garnet ages undertaken in this study are presented without blank-correction (Table S2) and with blank-correction (Table S3). A final summary table of all detrital garnet ages for this study, along with failed attempts and the reason for failure, is provided as Table S4.

#### **Table S2: Isotope ratios, grain size, and non-corrected ages for CT-147 detrital garnet**

Isotope ratios and original ages calculated without blank-correction along with grain size estimates. The grain size estimates are based on starting grain weight (mg) and the maximum cross-sectional area of the grain calculated from BSE images. The grains with the darkest grey backgrounds were discarded due to low precision ages or analytical problems. Age errors are  $2\sigma$ .



| Table 2.3: Isotope Ratios, Grain Size, and Non-Corrected Ages for CT-147 Detrital Garnet |                  |                |             |                |                              |                                          |                   |
|------------------------------------------------------------------------------------------|------------------|----------------|-------------|----------------|------------------------------|------------------------------------------|-------------------|
|                                                                                          | 147Sm/144Nd      | 2 sigma<br>err | 143Nd/144Nd | 2 sigma<br>err | Initial grain<br>weight (mg) | Cross-section<br>max. (mm <sup>2</sup> ) | ORIGINAL AGE      |
| garnet T1                                                                                | 3.454604         | 0.003009       | 0.521588    | 0.000189       | 0.88                         | 0.85                                     | 437.4 +/- 9.2 Ma  |
| leach T1 AL2                                                                             | 0.293084         | 0.000539       | 0.512528    | 0.000030       |                              |                                          |                   |
| garnet T2                                                                                | 2.844762         | 0.002307       | 0.520143    | 0.000214       | 0.98                         | 0.70                                     | 445.1 +/- 20.2 Ma |
| leach T2 AL2                                                                             | 0.873040         | 0.003459       | 0.514370    | 0.000152       |                              |                                          |                   |
| garnet T3                                                                                | 3.410635         | 0.002417       | 0.521426    | 0.000157       | 2.40                         | 1.15                                     | 431.7 +/- 10.2 Ma |
| leach T3                                                                                 | 0.634500         | 0.005867       | 0.513563    | 0.000097       |                              |                                          |                   |
| garnet T4                                                                                | 2.359129         | 0.004741       | 0.518790    | 0.000062       | 1.90                         | 1.13                                     | 446.9 +/- 4.3 Ma  |
| leach T4 AL2                                                                             | 0.153465         | 0.000046       | 0.512203    | 0.000006       |                              |                                          |                   |
| garnet T5                                                                                | 0.196574         | 0.000033       | 0.512295    | 0.000011       | 1.59                         | 1.15                                     | 442.9 +/- 22.6 Ma |
| leach T5                                                                                 | 0.115169         | 0.000006       | 0.512059    | 0.000005       |                              |                                          |                   |
| garnet T6                                                                                | 1.258271         | 0.001244       | 0.515294    | 0.000110       | 0.90                         | 0.71                                     | 433.3 +/- 14.8 Ma |
| leach T6                                                                                 | 0.123907         | 0.000361       | 0.512072    | 0.000009       |                              |                                          |                   |
| garnet T7                                                                                | 3.081143         | 0.003545       | 0.520887    | 0.000135       | 0.81                         | 0.69                                     | 596 +/- 88 Ma     |
| leach T7                                                                                 | 2.417928         | 0.003417       | 0.518295    | 0.000365       |                              |                                          |                   |
| garnet T8                                                                                | 1.431119         | 0.000647       | 0.516227    | 0.000068       | 0.55                         | 0.59                                     | 475.5 +/- 8.2 Ma  |
| leach T8                                                                                 | 0.169151         | 0.000057       | 0.512196    | 0.000013       |                              |                                          |                   |
| garnet T9                                                                                | 1.431428         | 0.002854       | 0.515986    | 0.000080       | 0.85                         | 0.66                                     | 441.9 +/- 12.8 Ma |
| leach T9                                                                                 | 0.471686         | 0.000243       | 0.513158    | 0.000017       |                              |                                          |                   |
| garnet T10                                                                               | 1.159475         | 0.000402       | 0.514832    | 0.000042       | 0.58                         | 0.49                                     | 421.0 +/- 6.5 Ma  |
| leach T10 AL2                                                                            | 0.110139         | 0.000092       | 0.512009    | 0.000013       |                              |                                          |                   |
| garnet T11                                                                               | 1.169703         | 0.000431       | 0.515193    | 0.000033       | 0.66                         | 0.53                                     | 416 +/- 23 Ma     |
| leach T11                                                                                | 0.531036         | 0.000603       | 0.513376    | 0.000097       |                              |                                          |                   |
| garnet and leach T12                                                                     | Sm failed to run |                |             |                | 0.54                         | 0.53                                     | No age calculated |
| garnet T13                                                                               | 0.606406         | 0.000488       | 0.513422    | 0.000043       | 0.37                         | 0.46                                     | 426.0 +/- 18.6 Ma |
| leach T13                                                                                | 0.149008         | 0.000371       | 0.512140    | 0.000036       |                              |                                          |                   |
| garnet T14                                                                               | 0.298374         | 0.000237       | 0.512637    | 0.000016       | 0.42                         | 0.36                                     | 622 +/- 130 Ma    |
| leach T14                                                                                | 0.954452         | 0.005009       | 0.515366    | 0.000564       |                              |                                          |                   |

|                      |                                       |          |          |          |      |      |                   |
|----------------------|---------------------------------------|----------|----------|----------|------|------|-------------------|
| garnet T15           | 3.522253                              | 0.014754 | 0.521083 | 0.000557 | 0.63 | 0.55 | 404.6 +/- 26.3 Ma |
| leach T15            | 0.279137                              | 0.000374 | 0.512392 | 0.000083 |      |      |                   |
| garnet T16           | 1.660236                              | 0.008357 | 0.516462 | 0.000345 | 0.44 | 0.50 | 430.0 +/- 36.8 Ma |
| leach T16            | 0.268871                              | 0.000216 | 0.512400 | 0.000039 |      |      |                   |
| garnet T17           | 2.398253                              | 0.004674 | 0.518220 | 0.000389 | 0.75 | 0.57 | 407.5 +/- 26.0 Ma |
| leach T17            | 0.145810                              | 0.000080 | 0.512127 | 0.000015 |      |      |                   |
| garnet T18           | 3.231762                              | 0.004855 | 0.520559 | 0.000406 | 0.76 | 0.54 | 409 +/- 21 Ma     |
| leach T18            | 0.338512                              | 0.000544 | 0.512640 | 0.000049 |      |      |                   |
| garnet and leach T19 | Grain lost during clean lab chemistry |          |          |          | 0.64 | 0.62 | No age calculated |
| garnet T20           | 2.650500                              | 0.006237 | 0.519343 | 0.000528 | 0.51 | 0.59 | 430.1 +/- 31.7 Ma |
| leach T20            | 0.154292                              | 0.000136 | 0.512172 | 0.000029 |      |      |                   |
| garnet T21           | 1.666358                              | 0.012387 | 0.516833 | 0.001083 | 0.86 | 0.51 | 479 +/- 120 Ma    |
| leach T21            | 0.265597                              | 0.000375 | 0.512473 | 0.000032 |      |      |                   |
| garnet T22           | 3.072970                              | 0.007801 | 0.520227 | 0.000613 | 0.89 | 0.82 | 414.5 +/- 37.3 Ma |
| leach T22            | 0.568721                              | 0.001006 | 0.513396 | 0.000048 |      |      |                   |
| garnet and leach T23 | No spread in Sm/Nd of points          |          |          |          | 1.06 | 0.88 | No age calculated |
| garnet and leach T24 | Grain lost during clean lab chemistry |          |          |          | 0.51 | 0.64 | No age calculated |
| garnet T25           | 0.210530                              | 0.002083 | 0.512426 | 0.000047 | 0.75 | 0.63 | 600 +/- 73 Ma     |
| leach T25            | 0.088878                              | 0.000061 | 0.512035 | 0.000008 |      |      |                   |
| garnet T26           | 2.230180                              | 0.009263 | 0.518007 | 0.000390 | 0.62 | 0.48 | 425.8 +/- 27.6 Ma |
| leach T26 AL2        | 0.111635                              | 0.000163 | 0.511985 | 0.000007 |      |      |                   |
| garnet and leach T27 | Grain lost during clean lab chemistry |          |          |          | 0.86 | 0.56 | No age calculated |
| garnet T28           | 1.686596                              | 0.011482 | 0.515816 | 0.001087 | 0.38 | 0.42 | 612 +/- 380 Ma    |
| leach T28            | 2.172145                              | 0.006269 | 0.517660 | 0.000420 |      |      |                   |
| garnet T29           | 2.334538                              | 0.009143 | 0.517962 | 0.000322 | 0.66 | 0.52 | 402 +/- 21 Ma     |
| leach T29            | 0.097050                              | 0.000108 | 0.512000 | 0.000019 |      |      |                   |
| garnet and leach T30 | Sm failed to run                      |          |          |          | 0.74 | 0.47 | No age calculated |
| garnet T31           | 2.586358                              | 0.082150 | 0.519102 | 0.000522 | 0.60 | 0.48 | 535 +/- 130 Ma    |
| leach T31            | 1.553543                              | 0.002849 | 0.516479 | 0.000330 |      |      |                   |

**Table S3: Isotope ratios and blank-corrected ages for CT-147 detrital garnet analyses**

Isotope ratios and ages calculated using the blank-correction protocol along with Nd TIMS load size. The values (isotope ratios, magnitude, and associated errors) for the blank used in the blank-correction are provided in the final row of the table. The grains with the darkest grey backgrounds were discarded due to low precision ages or analytical problems. Age errors are  $2\sigma$  but do not include the propagation of uncertainty in the decay constant, which is available in Table S4.

| Table 2.5: Isotope Ratios and Blank Corrected Ages for CT-147 Detrital Garnet Analyses |                                      |                |             |                |                            |                      |                  |
|----------------------------------------------------------------------------------------|--------------------------------------|----------------|-------------|----------------|----------------------------|----------------------|------------------|
|                                                                                        | 147Sm/144Nd                          | 2 sigma<br>err | 143Nd/144Nd | 2 sigma<br>err | Correlation<br>coefficient | Nd load size<br>(pg) | CORRECTED<br>AGE |
| garnet T1                                                                              | 3.632194011                          | 0.025305       | 0.522058363 | 0.000218       | 0.28721                    | 87.8                 | 435.9 +/- 9.5 Ma |
| leach T1 AL2                                                                           | 0.294217134                          | 0.000534       | 0.512528541 | 0.000031       | -0.01001                   | 940.5                |                  |
| garnet T2                                                                              | 2.962642114                          | 0.017046       | 0.520462635 | 0.000234       | 0.18967                    | 107.3                | 444.9 +/- 20 Ma  |
| leach T2 AL2                                                                           | 0.893901358                          | 0.005369       | 0.514435067 | 0.000163       | 0.03743                    | 127.0                |                  |
| garnet T3                                                                              | 3.497741503                          | 0.012492       | 0.521655817 | 0.000168       | 0.18347                    | 171.3                | 431.5 +/- 10 Ma  |
| leach T3                                                                               | 0.641704662                          | 0.005978       | 0.513583997 | 0.000101       | 0.00759                    | 220.4                |                  |
| garnet T4                                                                              | 2.446626668                          | 0.007294       | 0.518904177 | 0.000068       | 0.18636                    | 241.9                | 446.2 +/- 4.4 Ma |
| leach T4 AL2                                                                           | 0.153595988                          | 0.000049       | 0.512202996 | 0.000006       | 0.01252                    | 6622.6               |                  |
| garnet T5                                                                              | 0.196729074                          | 0.000039       | 0.512294809 | 0.000012       | -0.00389                   | 5644.8               | 442.0 +/- 23 Ma  |
| leach T5                                                                               | 0.115266121                          | 0.000026       | 0.512058962 | 0.000005       | -0.01567                   | 52918.7              |                  |
| garnet T6                                                                              | 1.281698714                          | 0.003385       | 0.515345087 | 0.000114       | 0.05680                    | 238.5                | 431.7 +/- 15 Ma  |
| leach T6                                                                               | 0.124024524                          | 0.000364       | 0.512071646 | 0.000009       | 0.00874                    | 5199.5               |                  |
| garnet T7                                                                              | 3.192505572                          | 0.015797       | 0.521185607 | 0.000150       | 0.28606                    | 124.9                | 635 +/- 110 Ma   |
| leach T7                                                                               | 2.606329307                          | 0.027591       | 0.518747278 | 0.000408       | 0.17120                    | 59.5                 |                  |
| garnet T8                                                                              | 1.514092463                          | 0.006126       | 0.516338233 | 0.000081       | 0.19127                    | 148.7                | 473.4 +/- 9.0 Ma |
| leach T8                                                                               | 0.177733815                          | 0.000100       | 0.512194686 | 0.000014       | -0.00590                   | 1304.4               |                  |
| garnet T9                                                                              | 1.521935689                          | 0.007881       | 0.516108719 | 0.000095       | 0.17368                    | 126.1                | 439.1 +/- 14 Ma  |
| leach T9                                                                               | 0.497220589                          | 0.000475       | 0.513161919 | 0.000019       | 0.03046                    | 697.4                |                  |
| garnet T10                                                                             | 1.144761854                          | 0.001544       | 0.514854938 | 0.000044       | 0.05881                    | 444.7                | 420.0 +/- 6.7 Ma |
| leach T10 AL2                                                                          | 0.110196636                          | 0.000093       | 0.512008951 | 0.000013       | -0.02244                   | 6099.5               |                  |
| garnet T11                                                                             | 1.228544287                          | 0.002464       | 0.515233208 | 0.000039       | 0.14722                    | 292.3                | 419 +/- 27 Ma    |
| leach T11                                                                              | 0.564466877                          | 0.003170       | 0.51341243  | 0.000113       | 0.04247                    | 106.9                |                  |
| garnet and leach T12                                                                   | Sm failed to run - no calculated age |                |             |                |                            |                      |                  |
| garnet T13                                                                             | 0.61918556                           | 0.000963       | 0.513431366 | 0.000044       | 0.02697                    | 427.7                | 425.8 +/- 19 Ma  |
| leach T13                                                                              | 0.154918682                          | 0.000435       | 0.512136745 | 0.000038       | 0.00377                    | 471.2                |                  |
| garnet T14                                                                             | 0.298521895                          | 0.000290       | 0.512637895 | 0.000017       | 0.00664                    | 1028.7               | 588 +/- 130 Ma   |
| leach T14                                                                              | 1.167765872                          | 0.033918       | 0.515989677 | 0.000749       | 0.14689                    | 24.1                 |                  |



|                       |                                                           |          |             |          |          |               |                 |
|-----------------------|-----------------------------------------------------------|----------|-------------|----------|----------|---------------|-----------------|
| garnet T15            | 4.212938856                                               | 0.108401 | 0.522657579 | 0.000744 | 0.34699  | 27.8          | 399.6 +/- 27 Ma |
| leach T15             | 0.290219172                                               | 0.000594 | 0.512391344 | 0.000084 | -0.01395 | 363.2         |                 |
| garnet T16            | 2.283392861                                               | 0.105512 | 0.517811901 | 0.000662 | 0.37223  | 17.0          | 411.3 +/- 46 Ma |
| leach T16             | 0.273866618                                               | 0.000326 | 0.51239951  | 0.000039 | 0.01177  | 641.5         |                 |
| garnet T17            | 2.784556697                                               | 0.054932 | 0.519056947 | 0.000493 | 0.28068  | 33.8          | 402.1 +/- 27 Ma |
| leach T17             | 0.152268046                                               | 0.000100 | 0.512125883 | 0.000016 | 0.01143  | 1839.3        |                 |
| garnet T18            | 3.734414871                                               | 0.068307 | 0.521639081 | 0.000518 | 0.32567  | 36.4          | 405 +/- 22 Ma   |
| leach T18             | 0.346271405                                               | 0.000883 | 0.512642118 | 0.000053 | 0.00470  | 281.1         |                 |
| garnet and leach T19  | Grain lost during clean lab chemistry - no calculated age |          |             |          |          |               |                 |
| garnet T20            | 3.155517121                                               | 0.072467 | 0.520496159 | 0.000677 | 0.26990  | 29.9          | 424.5 +/- 33 Ma |
| leach T20             | 0.161163457                                               | 0.000173 | 0.512171009 | 0.000029 | -0.00675 | 1042.7        |                 |
| garnet T21            | 1.808919631                                               | 0.025525 | 0.517230502 | 0.001184 | 0.03220  | 51.6          | 473 +/- 120 Ma  |
| leach T21             | 0.274232034                                               | 0.000518 | 0.512472671 | 0.000035 | -0.00655 | 434.0         |                 |
| garnet T22            | 3.643658221                                               | 0.089655 | 0.521619635 | 0.000788 | 0.28848  | 28.2          | 410.0 +/- 37 Ma |
| leach T22             | 0.586321415                                               | 0.001585 | 0.513410175 | 0.000052 | 0.02792  | 272.1         |                 |
| garnet and leach T23  | No spread in Sm/Nd of points - no calculated age          |          |             |          |          |               |                 |
| garnet and leach T24  | Grain lost during clean lab chemistry - no calculated age |          |             |          |          |               |                 |
| garnet T25            | 0.209538854                                               | 0.002108 | 0.512425263 | 0.000050 | -0.00116 | 316.3         | 586 +/- 76 Ma   |
| leach T25             | 0.107857406                                               | 0.000075 | 0.512035059 | 0.000008 | -0.02648 | 14381.3       |                 |
| garnet T26            | 2.661018854                                               | 0.062952 | 0.518959939 | 0.000526 | 0.28302  | 29.1          | 418.2 +/- 30 Ma |
| leach T26 AL2         | 0.114595425                                               | 0.000170 | 0.511985105 | 0.000007 | 0.01238  | 5981.9        |                 |
| garnet and leach T27  | Grain lost during clean lab chemistry - no calculated age |          |             |          |          |               |                 |
| garnet T28            | 2.634968912                                               | 0.185385 | 0.517549711 | 0.001770 | 0.18660  | 12.6          | negative age    |
| leach T28             | 2.458595915                                               | 0.038452 | 0.518255829 | 0.000495 | 0.17317  | 41.5          |                 |
| garnet T29            | 2.709710686                                               | 0.054727 | 0.518770663 | 0.000432 | 0.28888  | 33.4          | 396.0 +/- 24 Ma |
| leach T29             | 0.098706232                                               | 0.000110 | 0.511997204 | 0.000018 | -0.01595 | 5648.2        |                 |
| garnet and leach T30  | Sm failed to run - no calculated age                      |          |             |          |          |               |                 |
| garnet T31            | 2.6308493                                                 | 0.094160 | 0.519909479 | 0.000613 | 0.08783  | 39.7          | 521 +/- 120 Ma  |
| leach T31             | 1.706596631                                               | 0.016069 | 0.516751836 | 0.000362 | 0.09778  | 67.9          |                 |
| blank (wtd avg, n=22) | 0.045                                                     | 0.017    | 0.5125      | 0.0012   |          | 4.31 +/- 0.59 |                 |

**Table S4: Blank-corrected garnet age summary**

Nineteen accepted, blank-corrected detrital garnet ages including error propagation of uncertainty in the Sm decay constant. Also included are the reasons for sample loss or rejection.

| <b>Sample:</b> | <b>Age (Ma)</b>                                           | <b>+/- (Ma, 2<math>\sigma</math>)</b> |
|----------------|-----------------------------------------------------------|---------------------------------------|
| T1:            | 436                                                       | 12                                    |
| T2:            | 445                                                       | 22                                    |
| T3:            | 432                                                       | 13                                    |
| T4:            | 446                                                       | 9                                     |
| T5:            | 442                                                       | 24                                    |
| T6:            | 432                                                       | 17                                    |
| T7:            | Leach small and <1.0 spread in Sm/Nd<br>635 +/- 110 Ma    |                                       |
| T8:            | 473                                                       | 13                                    |
| T9:            | 439                                                       | 16                                    |
| T10:           | 420                                                       | 10                                    |
| T11:           | 419                                                       | 28                                    |
| T12:           | Sm failed to run - no age                                 |                                       |
| T13:           | 426                                                       | 21                                    |
| T14:           | Leach small and <1.0 spread in Sm/Nd<br>588 +/- 130 Ma    |                                       |
| T15:           | 400                                                       | 28                                    |
| T16:           | 411                                                       | 47                                    |
| T17:           | 402                                                       | 28                                    |
| T18:           | 405                                                       | 23                                    |
| T19:           | Grain lost in chemistry - no age                          |                                       |
| T20:           | 425                                                       | 34                                    |
| T21:           | Garnet Nd ran poorly - 473 +/- 120<br>Ma                  |                                       |
| T22:           | 410                                                       | 38                                    |
| T23:           | No spread in Sm/Nd data - no age                          |                                       |
| T24:           | Grain lost in chemistry - no age                          |                                       |
| T25:           | Garnet small and <1.0 spread in<br>Sm/Nd<br>586 +/- 77 Ma |                                       |
| T26:           | 418                                                       | 31                                    |
| T27:           | Grain lost in chemistry - no age                          |                                       |
| T28:           | Both garnet and leach small<br>negative age               |                                       |
| T29:           | 396                                                       | 25                                    |
| T30:           | Sm failed to run - no age                                 |                                       |
| T31:           | Both garnet and leach small - 521 +/-<br>120 Ma           |                                       |

## Statistical Comparison of Garnet, Monazite, and Zircon Ages

**Table S5: Variable Bandwidths for LA-KDE Calculations**

Values for the optimized variable bandwidths calculated for use in a locally adaptive kernel density estimation plot for tributary Sm-Nd garnet, U-Pb zircon rim, and Th-Pb monazite ages using DZstats (Saylor and Sundell, 2016).

| Age (Ma) | Sm-Nd Garnet | Th-Pb Monazite | U-Pb Zircon Rims |
|----------|--------------|----------------|------------------|
| 340      | 8.987873718  | 4.993216905    | 16.59319968      |
| 341      | 8.436322894  | 4.993216905    | 16.00438624      |
| 342      | 8.709685621  | 4.993216905    | 16.00438624      |
| 343      | 8.538346841  | 4.993216905    | 15.50212434      |
| 344      | 8.538346841  | 4.993216905    | 15.06863679      |
| 345      | 8.18230451   | 4.993216905    | 15.06863679      |
| 346      | 8.18230451   | 4.993216905    | 14.69070293      |
| 347      | 7.883455529  | 4.993216905    | 14.69070293      |
| 348      | 7.984699353  | 4.993216905    | 13.83192286      |
| 349      | 8.00997744   | 4.993216905    | 13.97909904      |
| 350      | 8.087252349  | 4.993216905    | 13.73083448      |
| 351      | 8.016361762  | 4.993216905    | 13.73083448      |
| 352      | 8.083905517  | 4.993216905    | 13.50694715      |
| 353      | 7.895362167  | 4.993216905    | 13.50694715      |
| 354      | 8.018453243  | 4.993216905    | 12.64624343      |
| 355      | 7.839870281  | 4.993216905    | 12.64624343      |
| 356      | 8.262992414  | 4.993216905    | 12.93027293      |
| 357      | 8.622206122  | 4.993216905    | 12.93027293      |
| 358      | 9.086637037  | 4.993216905    | 12.24987855      |
| 359      | 8.851354066  | 4.993216905    | 12.24987855      |
| 360      | 8.870079777  | 4.993216905    | 12.24987855      |
| 361      | 8.650892256  | 4.993216905    | 12.24987855      |
| 362      | 8.77740736   | 4.993216905    | 11.69907119      |
| 363      | 8.678302759  | 4.993216905    | 11.90837885      |
| 364      | 9.018543946  | 4.993216905    | 11.80790724      |
| 365      | 8.904896242  | 4.993216905    | 11.80790724      |
| 366      | 8.999419512  | 4.993216905    | 11.43628434      |
| 367      | 8.892179361  | 4.993216905    | 11.27506061      |
| 368      | 9.229353345  | 4.993216905    | 10.93700668      |
| 369      | 9.192444909  | 4.993216905    | 10.80027951      |
| 370      | 9.313382262  | 4.993216905    | 10.64414766      |
| 371      | 9.407168835  | 4.993216905    | 10.95453925      |

|     |             |             |             |
|-----|-------------|-------------|-------------|
| 372 | 9.772534959 | 4.993216905 | 10.74735568 |
| 373 | 9.986766068 | 4.993216905 | 10.69887982 |
| 374 | 10.07901089 | 4.993216905 | 10.54212127 |
| 375 | 10.30208725 | 4.993216905 | 10.7003865  |
| 376 | 10.69372152 | 4.993216905 | 10.50253042 |
| 377 | 11.30224381 | 4.993216905 | 10.66198514 |
| 378 | 11.7860827  | 4.993216905 | 10.87648763 |
| 379 | 12.57758167 | 4.993216905 | 11.34759099 |
| 380 | 13.1937172  | 4.993216905 | 11.11515725 |
| 381 | 13.26499126 | 4.993216905 | 11.50923937 |
| 382 | 13.93646043 | 4.993216905 | 11.50923937 |
| 383 | 14.6795332  | 4.993216905 | 11.60185955 |
| 384 | 15.50630808 | 4.993216905 | 11.29477604 |
| 385 | 15.54441015 | 4.993216905 | 11.77879986 |
| 386 | 16.45361595 | 4.993216905 | 11.58710341 |
| 387 | 17.47578978 | 4.993216905 | 11.68469264 |
| 388 | 17.47681872 | 4.993216905 | 11.76309768 |
| 389 | 17.47780579 | 4.993216905 | 12.25513192 |
| 390 | 17.47875347 | 4.993216905 | 12.17034395 |
| 391 | 17.47966408 | 4.993216905 | 12.37584121 |
| 392 | 17.48053977 | 4.993216905 | 12.70155356 |
| 393 | 17.48138249 | 4.993216905 | 13.26179637 |
| 394 | 17.48219407 | 4.993216905 | 13.56230052 |
| 395 | 17.48297622 | 4.993216905 | 13.56230052 |
| 396 | 17.63311579 | 4.993216905 | 13.87673889 |
| 397 | 17.63117917 | 4.993216905 | 14.43033731 |
| 398 | 17.62931091 | 4.993216905 | 14.82897286 |
| 399 | 17.62931091 | 4.993216905 | 14.89385656 |
| 400 | 17.46705385 | 4.993216905 | 15.85267341 |
| 401 | 17.46807266 | 4.993216905 | 16.56547459 |
| 402 | 17.46905645 | 4.993216905 | 16.61157911 |
| 403 | 17.470007   | 4.993216905 | 17.38129365 |
| 404 | 17.47092595 | 4.993216905 | 18.22580501 |
| 405 | 17.47181488 | 4.993216905 | 18.24846336 |
| 406 | 17.47267521 | 4.993216905 | 18.27039391 |
| 407 | 17.47350831 | 4.993216905 | 18.29163118 |
| 408 | 17.47431545 | 4.993216905 | 18.31220752 |
| 409 | 17.47509783 | 4.993216905 | 18.33215331 |
| 410 | 17.47585657 | 4.993216905 | 18.3514971  |
| 411 | 17.47659272 | 4.993216905 | 18.37026575 |
| 412 | 17.47730728 | 4.993216905 | 18.38848452 |
| 413 | 17.47800118 | 4.993216905 | 18.40617723 |
| 414 | 17.47867531 | 4.993216905 | 18.71385318 |



|     |             |             |             |
|-----|-------------|-------------|-------------|
| 415 | 17.47867531 | 4.993216905 | 19.54737399 |
| 416 | 17.47800118 | 4.993216905 | 19.466487   |
| 417 | 17.48191574 | 4.993216905 | 18.93036716 |
| 418 | 17.43630829 | 4.993216905 | 18.94306377 |
| 419 | 17.54711643 | 4.993216905 | 18.95529736 |
| 420 | 17.51192531 | 4.993216905 | 18.9670928  |
| 421 | 17.50619263 | 4.993216905 | 18.97847321 |
| 422 | 17.4747734  | 4.993216905 | 18.98946012 |
| 423 | 17.37547318 | 4.993216905 | 18.98946012 |
| 424 | 17.37322253 | 4.993216905 | 19.00007358 |
| 425 | 17.37090325 | 4.993216905 | 19.01033233 |
| 426 | 17.37090325 | 4.993216905 | 18.99325084 |
| 427 | 17.37184709 | 4.993216905 | 19.00310972 |
| 428 | 17.37405208 | 4.993216905 | 19.01266032 |
| 429 | 17.37405208 | 4.993216905 | 19.01266032 |
| 430 | 17.40025372 | 4.993216905 | 19.02191688 |
| 431 | 17.37090325 | 4.993216905 | 19.03089277 |
| 432 | 17.33979771 | 4.993216905 | 19.01470659 |
| 433 | 17.24310447 | 4.993216905 | 19.02338157 |
| 434 | 17.24310447 | 4.993216905 | 19.02338157 |
| 435 | 17.23876701 | 4.993216905 | 19.02338157 |
| 436 | 17.23429414 | 4.993216905 | 19.02338157 |
| 437 | 17.22967942 | 4.993216905 | 19.03960057 |
| 438 | 17.22491599 | 4.993216905 | 19.01948182 |
| 439 | 17.21999654 | 4.993216905 | 19.00709279 |
| 440 | 17.21491329 | 4.993216905 | 19.03583419 |
| 441 | 17.20965791 | 4.993216905 | 18.95828439 |
| 442 | 17.20422151 | 4.993216905 | 18.85922406 |
| 443 | 17.19859457 | 4.993216905 | 18.76759056 |
| 444 | 17.1927669  | 4.993216905 | 18.76759056 |
| 445 | 17.18672756 | 4.993216905 | 18.7764167  |
| 446 | 17.10653163 | 4.993216905 | 18.79955621 |
| 447 | 17.37637043 | 4.993216905 | 18.79955621 |
| 448 | 17.73493926 | 4.993216905 | 18.7764167  |
| 449 | 17.78249062 | 4.993216905 | 18.70895346 |
| 450 | 17.82629732 | 4.993216905 | 18.66402121 |
| 451 | 17.82958986 | 4.993216905 | 18.66402121 |
| 452 | 17.83295524 | 4.993216905 | 18.66402121 |
| 453 | 17.8363959  | 4.993216905 | 18.68459841 |
| 454 | 17.83991439 | 4.993216905 | 18.60331414 |
| 455 | 17.84351338 | 4.993216905 | 18.60331414 |
| 456 | 17.84719567 | 4.993216905 | 18.60331414 |
| 457 | 17.85096418 | 4.993216905 | 18.58680151 |

|     |             |             |             |
|-----|-------------|-------------|-------------|
| 458 | 17.85482198 | 4.993216905 | 18.56974033 |
| 459 | 17.85877228 | 4.993216905 | 18.57188698 |
| 460 | 17.86281844 | 4.993216905 | 18.55363231 |
| 461 | 17.866964   | 4.993216905 | 18.5347267  |
| 462 | 17.87121267 | 4.993216905 | 18.31555815 |
| 463 | 17.87556834 | 4.993216905 | 18.29271003 |
| 464 | 17.88003511 | 4.993216905 | 18.26904339 |
| 465 | 17.88461728 | 4.993216905 | 18.24451344 |
| 466 | 17.88931938 | 4.993216905 | 18.21907208 |
| 467 | 17.89414618 | 4.993216905 | 18.19266755 |
| 468 | 17.89910272 | 4.993216905 | 18.16524408 |
| 469 | 17.90419428 | 4.993216905 | 18.13674155 |
| 470 | 17.90942647 | 4.993216905 | 18.10709499 |
| 471 | 17.9148052  | 4.993216905 | 16.93061687 |
| 472 | 17.9203367  | 4.993216905 | 16.14995426 |
| 473 | 17.92602758 | 4.993216905 | 15.57419419 |
| 474 | 17.93188483 | 4.993216905 | 15.52001503 |
| 475 | 17.93791585 | 4.993216905 | 15.46436288 |
| 476 | 18.02510114 | 4.993216905 | 15.40717683 |
| 477 | 18.03289295 | 4.993216905 | 15.34839259 |
| 478 | 18.04093157 | 4.993216905 | 15.28794222 |
| 479 | 18.04922891 | 4.993216905 | 15.22575384 |
| 480 | 18.05779766 | 4.993216905 | 15.16175143 |
| 481 | 18.11230357 | 4.993216905 | 14.5407604  |
| 482 | 18.17086924 | 4.993216905 | 14.46879123 |
| 483 | 18.22126248 | 4.993216905 | 14.39475075 |
| 484 | 18.27371916 | 4.993216905 | 13.81273035 |
| 485 | 18.54407311 | 4.993216905 | 13.27594636 |
| 486 | 18.96113828 | 4.993216905 | 13.19069794 |
| 487 | 18.96113828 | 4.993216905 | 12.81477671 |
| 488 | 19.40928572 | 4.993216905 | 12.33325339 |
| 489 | 19.45110556 | 4.993216905 | 12.23860798 |
| 490 | 19.49482415 | 4.993216905 | 12.23860798 |
| 491 | 19.49482415 | 4.993216905 | 11.9634044  |
| 492 | 19.49482415 | 4.993216905 | 11.47388291 |
| 493 | 19.75600505 | 4.993216905 | 11.29122672 |
| 494 | 20.2258715  | 4.993216905 | 11.12001069 |
| 495 | 20.63373138 | 4.993216905 | 10.93871028 |
| 496 | 21.14734374 | 4.993216905 | 10.69987557 |
| 497 | 21.14734374 | 4.993216905 | 10.6316018  |
| 498 | 21.14734374 | 4.993216905 | 10.64405248 |
| 499 | 21.14734374 | 4.993216905 | 10.5105328  |
| 500 | 21.44048283 | 4.993216905 | 10.3729781  |

|     |             |             |             |
|-----|-------------|-------------|-------------|
| 501 | 21.90091731 | 4.993216905 | 10.69669973 |
| 502 | 22.35912325 | 4.993216905 | 10.51090791 |
| 503 | 22.35912325 | 4.993216905 | 10.29241161 |
| 504 | 22.35912325 | 4.993216905 | 10.17423562 |
| 505 | 22.35912325 | 4.993216905 | 10.45523609 |
| 506 | 22.35912325 | 4.993216905 | 10.45523609 |
| 507 | 22.64408694 | 4.993216905 | 10.30409431 |
| 508 | 22.95436723 | 4.993216905 | 10.10580663 |
| 509 | 23.2934947  | 4.993216905 | 10.43565643 |
| 510 | 23.66568841 | 4.993216905 | 10.15043764 |

### Figure S3: Cumulative Distribution Functions (CDFs)

Cumulative Distribution Functions calculated along with the Probability Distribution Plot (top plot) and the locally adaptive Kernel Density Estimation (bottom plot) by DZstats (Saylor and Sundell, 2016). The CDFs are utilized for two-sample comparison of age distributions using a Kolmogorov-Smirnov Test (Supplementary Table S6).

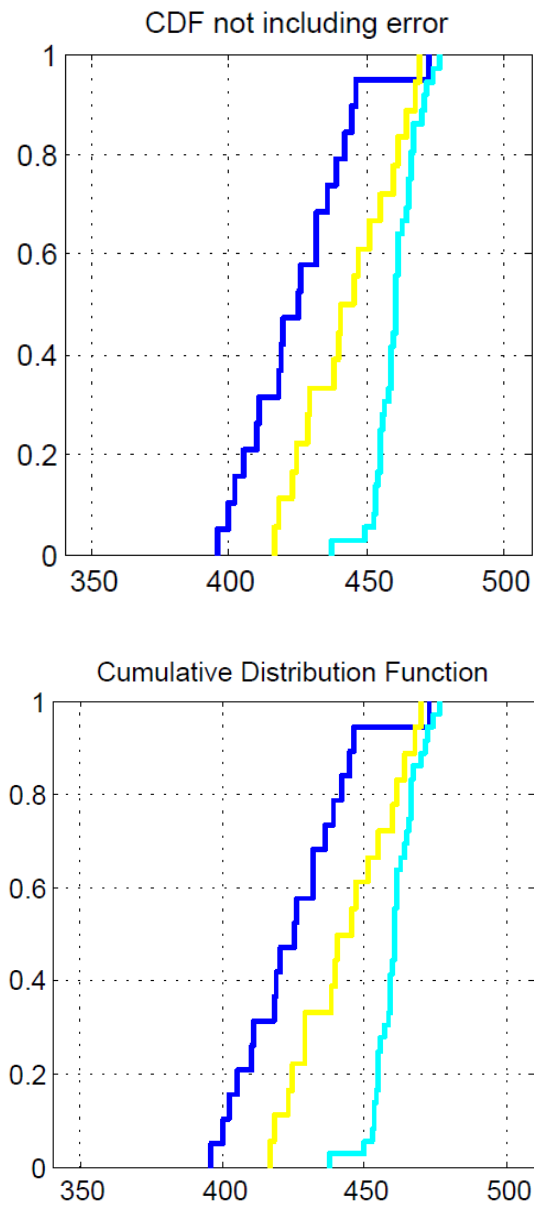

**Table S6: Values from Statistical Comparison of Garnet, Monazite, and Zircon Ages**

Results from statistical comparison of PDP plots (Figure 3) through cross-correlation, likeness, and similarity testing and CDF plots (Supplementary Figure S3) using a Kolmogorov-Smirnov test. These tests were run using the program DZstats to compare the age distributions of the Sm-Nd garnet, U-Pb zircon rim, and Th-Pb monazite ages from the tributaries (Saylor and Sundell, 2016). A two-sample, non-parametric Kolmogorov-Smirnov test comparing the cumulative distribution functions for the Sm-Nd garnet and the Pb-Th monazite ages, results in a p-value of  $2.32 \times 10^{-10}$  (see below). A p-value  $<0.05$  correlates to a 95% confidence level that the garnet and monazite age distributions are not drawn from the same parent age distribution (Saylor and Sundell, 2016). Small sample sizes ( $n < 50$ ) limit the reliability of some alternative statistical means of population comparison but are still useful in confirming conclusions from visual inspection of the PDP. Cross-correlation, likeness, and similarity tests on the PDP support the fundamental conclusion that the monazite and garnet age distributions are not drawn from the same parent age distribution.

| <b>Statistical Comparison using the PDP and CDF for all Paleozoic Sm-Nd garnet, U-Pb zircon rim, and Th-Pb monazite tributary ages</b> |        |        |        |
|----------------------------------------------------------------------------------------------------------------------------------------|--------|--------|--------|
| 1. garnet, 2. monazite, 3. zircon rims                                                                                                 |        |        |        |
| <b>Cross-correlation<br/>(R-Squared crossplot)</b>                                                                                     | 1      | 2      | 3      |
| 1                                                                                                                                      | 1      | 0.0039 | 0.4822 |
| 2                                                                                                                                      | 0.0039 | 1      | 0.3744 |
| 3                                                                                                                                      | 0.4822 | 0.3744 | 1      |
| <b>Likeness</b>                                                                                                                        | 1      | 2      | 3      |
| 1                                                                                                                                      | 1      | 0.2578 | 0.6846 |
| 2                                                                                                                                      | 0.2578 | 1      | 0.5516 |
| 3                                                                                                                                      | 0.6846 | 0.5516 | 1      |
| <b>Similarity</b>                                                                                                                      | 1      | 2      | 3      |
| 1                                                                                                                                      | 0.9999 | 0.546  | 0.901  |
| 2                                                                                                                                      | 0.546  | 1      | 0.8267 |
| 3                                                                                                                                      | 0.901  | 0.8267 | 0.9996 |

| Kolmogorov-Smirnov Test                    |          |          |          |
|--------------------------------------------|----------|----------|----------|
| k-statistic<br>(not including uncertainty) | 1        | 2        | 3        |
| 1                                          | 0        | 0.9196   | 0.4035   |
| 2                                          | 0.9196   | 0        | 0.6111   |
| 3                                          | 0.4035   | 0.6111   | 0        |
| p-value<br>(not including uncertainty)     | 1        | 2        | 3        |
| 1                                          | 1        | 2.32E-10 | 0.0718   |
| 2                                          | 2.32E-10 | 1        | 1.15E-04 |
| 3                                          | 0.0718   | 1.15E-04 | 1        |

## SUPPLEMENTARY DISCUSSION

### Age Calculation Sensitivity Checks

Results of sensitivity testing support accuracy (within quoted uncertainty) of the garnet age distribution. Since this is the first full-scale application of detrital garnet geochronology we also consider the accuracy of the method using two age calculation sensitivity checks:

1. The sensitivity of the blank correction protocol was tested using two different sets of blank parameters, one measured and the other idealized from a synthesis of values published in the literature. The difference in the resulting absolute ages were  $<5$  Ma for all samples and well within the reported  $2\sigma$  age error.
2. The impact of using inclusions as a proxy for the source whole-rock was also considered, as inclusions are unlikely perfectly representative of the whole-rock chemistry. To test sensitivity to the variable inclusion population we replaced leached inclusion analyses with four different whole-rock Sm-Nd value from along-strike ATFMS schist samples measured by Goldberg and Dallmeyer (1997). These whole rock compositions are the best available representation of the likely Sm-Nd composition of a pelitic parent source rock, although they are geographically sourced from a different part of the ATFMS. Direct analysis of Sm-Nd whole rock composition for an Ashe Gneiss and Ashe Schist sample from within the tributary basin would be preferable, but that material was not available during sample analysis. All but two of the garnet grains have ages using all four whole rock values that remain within the  $2\sigma$  age error of the original results, and the overall age distribution pattern remains unchanged, with ages from the Devonian to Ordovician. The two grains that showed variation in the absolute age beyond the stated age error were the only two analyses with Sm/Nd ratios below 1.0, indicating that the garnet may not have been fully cleansed.

The high Sm-Nd garnet analyses act as the primary control over the slope of the isochron and resulting age, limiting the impact of variation in the inclusions on age accuracy.

Detrital garnet age analyses with an Sm/Nd ratio exceeding 1.0 should be insulated from variation imposed by variable inclusion populations.

**Table S7: Age Variation from Age Sensitivity Testing using Whole Rock Analyses**

|            | Final Detrital<br>Garnet Age | Age w/ Ashe<br>Schist WR #15 | Age w/ Ashe<br>Schist WR #21 | Age w/ Ashe<br>Schist WR #24 | Age w/ Ashe<br>Schist WR #29 |
|------------|------------------------------|------------------------------|------------------------------|------------------------------|------------------------------|
| garnet T1  | 436 +/- 12                   | 432 +/- 10                   | 433 +/- 10                   | 437 +/- 10                   | 432 +/- 10                   |
| garnet T2  | 445 +/- 22                   | 448 +/- 13                   | 450 +/- 13                   | 454 +/- 13                   | 447 +/- 13                   |
| garnet T3  | 432 +/- 13                   | 431 +/- 8                    | 432 +/- 8                    | 436 +/- 8                    | 431 +/- 8                    |
| garnet T4  | 446 +/- 9                    | 445 +/- 5                    | 447 +/- 5                    | 452 +/- 5                    | 444 +/- 5                    |
| garnet T5  | 442 +/- 24                   | 334 +/- 24                   | 399 +/- 28                   | 565 +/- 26                   | 340 +/- 23                   |
| garnet T6  | 432 +/- 17                   | 423 +/- 15                   | 427 +/- 15                   | 438 +/- 15                   | 423 +/- 15                   |
| garnet T8  | 473 +/- 17                   | 461 +/- 9                    | 465 +/- 9                    | 474 +/- 9                    | 461 +/- 9                    |
| garnet T9  | 439 +/- 16                   | 433 +/- 10                   | 437 +/- 10                   | 446 +/- 10                   | 433 +/- 10                   |
| garnet T10 | 420 +/- 10                   | 406 +/- 7                    | 411 +/- 7                    | 424 +/- 7                    | 406 +/- 7                    |
| garnet T11 | 419 +/- 28                   | 428 +/- 5                    | 432 +/- 5                    | 444 +/- 5                    | 427 +/- 5                    |
| garnet T13 | 426 +/- 21                   | 399 +/- 13                   | 409 +/- 14                   | 434 +/- 13                   | 399 +/- 13                   |
| garnet T15 | 400 +/- 28                   | 393 +/- 29                   | 394 +/- 29                   | 397 +/- 29                   | 393 +/- 29                   |
| garnet T16 | 411 +/- 47                   | 401 +/- 49                   | 404 +/- 50                   | 409 +/- 50                   | 401 +/- 49                   |
| garnet T17 | 402 +/- 28                   | 397 +/- 29                   | 399 +/- 29                   | 404 +/- 29                   | 397 +/- 29                   |
| garnet T18 | 405 +/- 23                   | 402 +/- 23                   | 403 +/- 23                   | 407 +/- 23                   | 402 +/- 23                   |
| garnet T20 | 425 +/- 34                   | 421 +/- 35                   | 423 +/- 35                   | 427 +/- 35                   | 421 +/- 35                   |
| garnet T22 | 410 +/- 38                   | 411 +/- 35                   | 413 +/- 35                   | 416 +/- 35                   | 411 +/- 35                   |
| garnet T26 | 418 +/- 31                   | 410 +/- 32                   | 413 +/- 33                   | 418 +/- 33                   | 410 +/- 32                   |
| garnet T29 | 396 +/- 25                   | 392 +/- 26                   | 394 +/- 26                   | 399 +/- 26                   | 392 +/- 26                   |



## **Potential Sampling Bias in Previously Published Data**

We also consider potential variability in age populations resulting from sampling bias. Monazite is fairly stable during sedimentary diagenesis, but its stability during sedimentary transport is not well quantified (Morton and Hallsworth, 1999). Silurian monazite growth or resetting may have occurred regionally but was missed in the tributary record due to rim abrasion or loss of smaller, later nucleating monazite grains (Moecher et al., 2011). Garnet's moderate to high stability during transport and diagenesis (Morton and Hallsworth, 1999) and much larger original grain size as a rock-forming mineral (often orders of magnitude larger than the accessory mineral detrital grain fragments sampled) reduces potential for sampling bias from loss of small secondary grains.

## SUPPLEMENT REFERENCES

- Goldberg, S. A., and Dallmeyer, R. D., 1997, Chronology of Paleozoic metamorphism and deformation in the Blue Ridge thrust complex, North Carolina and Tennessee: *American Journal of Science*, v. 297, no. 5, p. 488-526.
- Hietpas, J., Samson, S., Moecher, D., and Schmitt, A. K., 2010, Recovering tectonic events from the sedimentary record: Detrital monazite plays in high fidelity: *Geology*, v. 38, no. 2, p. 167-170.
- Krippner, A., Meinhold, G., Morton, A.C., and von Eynatten, H., 2014, Evaluation of garnet discrimination diagrams using geochemical data of garnets derived from various host rocks: *Sedimentary Geology*, v. 306, p. 36-52.
- Ludwig, K., 2003, User's manual for Isoplot 3.00: a geochronological toolkit for Microsoft Excel, Kenneth R. Ludwig, v. 4.
- Mange, M. A., and Morton, A. C., 2007, Chapter 13 Geochemistry of Heavy Minerals, *in* Maria, A. M., and David, T. W., eds., *Developments in Sedimentology, Volume Volume 58*, Elsevier, p. 345-391.
- Moecher, D. P., Samson, S. D., and Miller, C. F., 2004, Precise Time and Conditions of Peak Taconian Granulite Facies Metamorphism in the Southern Appalachian Orogen, U.S.A., with Implications for Zircon Behavior during Crustal Melting Events: *The Journal of Geology*, v. 112, no. 3, p. 289-304.
- Moecher, D., Hietpas, J., Samson, S., and Chakraborty, S., 2011, Insights into southern Appalachian tectonics from ages of detrital monazite and zircon in modern alluvium: *Geosphere*, v. 7, no. 2, p. 494-512.
- Morton, A. C., and Hallsworth, C. R., 1999, Processes controlling the composition of heavy mineral assemblages in sandstones: *Sedimentary Geology*, v. 124, no. 1-4, p. 3-29.
- O'Sullivan, G., Chew, D., and Samson, S., 2016, Detecting magma-poor orogens in the detrital record: *Geology*, p. 871-874.
- Rubatto, D., Williams, I. S., and Buick, I. S., 2001, Zircon and monazite response to prograde metamorphism in the Reynolds Range, central Australia: *Contributions to Mineralogy and Petrology*, v. 140, no. 4, p. 458-468.
- Saylor, J.E. and Sundell, K.E., 2016, Quantifying comparison of large detrital geochronology data sets: *Geosphere*, v. 12, p. 203-220.
